# Supplementary material
Source: publisher figshare collection journal article supplement (https://acs.figshare.com/ndownloader/files/25960212)
Supplement: Supplementary file 1 [file 25960212]

# Supporting Information

## Superhydrophilic Fe<sup>3+</sup> Doped TiO<sub>2</sub> Films with Long-Lasting Antifogging Performance

*Yi Yang<sup>ab</sup>, Tianyu Sun<sup>ab</sup>, Fuliang Ma<sup>\*a</sup>, Liang-Feng Huang<sup>a</sup>, Zhixiang Zeng<sup>\*a</sup>*

<sup>a</sup> Key Laboratory of Marine Materials and Related Technologies, Zhejiang Key Laboratory of Marine Materials and Protective Technologies, Ningbo Institute of Materials Technology and Engineering, Chinese Academy of Sciences, Ningbo 315201, P. R. China

\*E-mail: mafuliang@nimte.ac.cn; zengzhx@nimte.ac.cn

<sup>b</sup> Center of Materials Science and Optoelectronics Engineering, University of Chinese Academy of Sciences, Beijing 100049, P. R. China

### Corresponding Authors

Fuliang Ma - mafuliang@nimte.ac.cn

Zhixiang Zeng - zengzhx@nimte.ac.cn

## Materials

Tetrabutyl titanate ( $\geq 99.0\%$ ) and sodium dodecyl sulfate (SDS, 92.5-100.5%) was purchased from Aladdin Industrial Corporation (Shanghai, China); nitric acid (65.0 ~ 68.0%), Iron nitrate nonahydrate ( $\text{Fe}(\text{NO}_3)_3 \cdot 9\text{H}_2\text{O}$ ,  $\geq 98.5\%$ ) and absolute ethyl alcohol ( $\geq 95\%$ ) were obtained from Sinopharm Chemical Reagent Co., Ltd. (Beijing, China). Glass slides ( $75 \times 25 \times 1 \text{ mm}^3$ ) were consecutively sonicated in acetone and anhydrous ethanol for 20 min followed by blow-drying with nitrogen flow.

## Preparation of $\text{Fe}^{3+}$ Doped $\text{TiO}_2$ Films

Tetrabutyl titanate (17.02 mL, 0.05 mol) was dissolved in absolute ethyl alcohol (40 mL). After stirring magnetically for 30 minutes, deionized water (9 mL) with SDS (0.68 g) dissolved and absolute ethyl alcohol (25 mL) were mixed together and added into the solution dropwise, then add different amounts of ferric nitrate. The pH value of the solution was buffered close to 3 using nitric acid. After stirring magnetically for 2 hours, adding different amounts of  $\text{Fe}(\text{NO}_3)_3 \cdot 9\text{H}_2\text{O}$ . The molar ratios of Fe and Ti are 0, 0.5%, 1%, 2% and 3%. After ageing at room temperature overnight, transparent sols were obtained.

The  $\text{Fe}^{3+}$  doped  $\text{TiO}_2$  film was prepared by dip-coating method. The withdrawal speed was  $120 \text{ mm min}^{-1}$  and the soaking time was 1 min. After coating, the samples were heat treated in a Muffle furnace. The temperature was elevated to  $200^\circ\text{C}$  and kept for 30 min first. And then the above samples were annealed at  $450^\circ\text{C}$  for 60 min. The heating rate was  $3^\circ\text{C min}^{-1}$ .

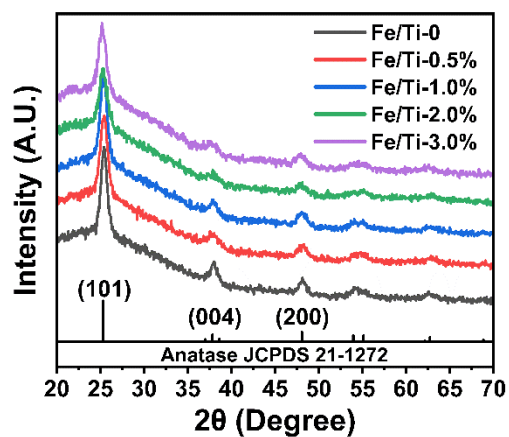

**Figure S1.** XRD patterns of different Fe<sup>3+</sup> doped TiO<sub>2</sub> films coated on the glass substrates.

## Antifogging Test

The process of antifogging test is shown in **Video S1**. The sample in this video is Fe/Ti-1.0% after being placed in the dark for 60 days.

## Details of Recoverable Superhydrophilicity

As shown in Figure 10, the light absorption of the film is mainly in the ultraviolet region. In the xenon lamp test, we adopt ISO 11341. The radiant flux was set to  $60 \text{ W m}^{-2}$  between 300 and 400 nm and the irradiation time was one hour. The relationship between irradiance and exposure dose is as **Formula S1**.

$$H_e = \int E_e dt \quad (1)$$

The exposure dose during one hour in the xenon light box was calculated to be  $0.216 \text{ MJ m}^{-2}$ . Relevant research shows that the total amount of exposure dose in Hebei Province, China in 2011 was  $237.44 \text{ MJ m}^{-2}$ , which is converted to  $0.65 \text{ MJ m}^{-2}$  per day.<sup>S1</sup> In Ningbo, Zhejiang Province of China, the annual average ultraviolet irradiance was  $21.3 \text{ W m}^{-2}$  in 2015.<sup>S2</sup> In other words, ignoring the complex and changeable conditions of outdoor weather, about three-hour test of outdoor conditions are equivalent to one-hour xenon lamp test. Some researchers had calculated the total daily average ultraviolet radiation in Beijing, China from January 1979 to June 1996.<sup>S3</sup> They all exceed  $0.4 \text{ MJ m}^{-2}$ , which can meet the energy demand of the film to restore antifogging. It can be seen from the above that the film can restore hydrophilicity under natural conditions.

## References

- S1. Hou, X. W.; Liao, Y. H.; Cao, C. L.; Qi, X. H.; Fan, X., Spatial and Temporal Distribution Characteristics of Solar Ultraviolet Radiation in Hebei Province. *J. Arid Meteorol.* **2012**, 30 (4), 583-587. (in Chinese)
- S2. Jiang, L. L.; Qian, Y. Z.; Duan, J. J.; Du, K., Study on Ultraviolet Radiation Distribution Characteristics and Intensity Forecast Service Technology in Ningbo City. *J. Zhejiang Meteorol.* **2018**, 39 (3), 22-28,49. (in Chinese)
- S3. Bai, J. H.; Wang, G. C., Variation Trend of Total Solar Ultraviolet Radiation in Beijing Area from 1979 to 1996. *Chinese J. Atmos. Sci.* **1998**, 22 (5), 3-5. (in Chinese)
